# Supplementary material
Source: PubMed Central journal article supplement (PMC5165187)
Supplement: JVI.01339-16_zjv999182207s2.pdf [file JVI.01339-16_zjv999182207s2.pdf]

**Movie S1: 3D reconstruction of the tilt series of TB40-BAC4-UL74stop cytoplasmic virus particles.** The tomogram was acquired from 600 nm sections of the assembly complex of a late stage UL74stop infected fibroblast. Several fully enveloped virus particles can be seen.
